# Supplementary material
Source: PubMed Central journal article supplement (PMC4833666)
Supplement: NIHMS768664-supplement-1.pdf [file NIHMS768664-supplement-1.pdf]

## Supplementary Online Content

Klassen AF, Cano SJ, Schwitzer JA, et al. Development and psychometric validation of the FACE-Q skin, lips, and facial rhytids appearance scales and adverse effect checklists for cosmetic procedures. *JAMA Dermatol*. Published online March 2, 2016. doi:10.1001/jamadermatol.2016.0018.

**eTable 1.** Content of the FACE-Q Scales and Checklists

**eTable 2.** RMT Statistical Indicators of Fit

This supplementary material has been provided by the authors to give readers additional information about their work.

**eTable 1. Content of the FACE-Q Scales and Checklists**

**Satisfaction With Skin**

|  |                   |                       |                    |                |
|-----------------------------------------------------------------------------------|-------------------|-----------------------|--------------------|----------------|
|                                                                                   | Very dissatisfied | Somewhat dissatisfied | Somewhat satisfied | Very satisfied |
| 1. How your facial skin looks at the <u>end of your day</u> ?                     | 1                 | 2                     | 3                  | 4              |
| 2. How <u>healthy</u> your facial skin looks?                                     | 1                 | 2                     | 3                  | 4              |
| 3. How <u>attractive</u> your facial skin makes you look?                         | 1                 | 2                     | 3                  | 4              |
| 4. How <u>smooth</u> your facial skin looks?                                      | 1                 | 2                     | 3                  | 4              |
| 5. How <u>clear</u> your facial skin (complexion) looks?                          | 1                 | 2                     | 3                  | 4              |
| 6. How <u>refreshed</u> your facial skin makes you look?                          | 1                 | 2                     | 3                  | 4              |
| 7. How <u>hydrated</u> your facial skin looks?                                    | 1                 | 2                     | 3                  | 4              |
| 8. How your facial skin looks when you first <u>wake up</u> ?                     | 1                 | 2                     | 3                  | 4              |
| 9. How <u>radiant</u> your facial skin looks?                                     | 1                 | 2                     | 3                  | 4              |
| 10. How the <u>tone</u> (color) of your facial skin looks?                        | 1                 | 2                     | 3                  | 4              |
| 11. How your <u>pores</u> look?                                                   | 1                 | 2                     | 3                  | 4              |
| 12. How <u>even-colored</u> your facial skin looks?                               | 1                 | 2                     | 3                  | 4              |

© 2013 Memorial Sloan-Kettering Cancer Center. All rights reserved. This FACE-Q scale, nor any part thereof may be reproduced or utilized in any form, or by any means without prior consent by way of a License Agreement.

## Satisfaction with Lips

|     |                   |                       |                    |                |
|--------------------------------------------------------------------------------------|-------------------|-----------------------|--------------------|----------------|
|                                                                                      | Very dissatisfied | Somewhat dissatisfied | Somewhat satisfied | Very satisfied |
| 1. The shape of your <u>lower lip</u> ?                                              | 1                 | 2                     | 3                  | 4              |
| 2. How well your lips <u>suit</u> your face?                                         | 1                 | 2                     | 3                  | 4              |
| 3. How nice your lips look when you <u>smile</u> ?                                   | 1                 | 2                     | 3                  | 4              |
| 4. How full your <u>lower lip</u> looks?                                             | 1                 | 2                     | 3                  | 4              |
| 5. The <u>style</u> of your lips (e.g. pouty, natural)?                              | 1                 | 2                     | 3                  | 4              |
| 6. The shape of your <u>upper lip</u> ?                                              | 1                 | 2                     | 3                  | 4              |
| 7. How <u>turned up</u> your upper lip (cupids bow) looks?                           | 1                 | 2                     | 3                  | 4              |
| 8. The <u>size</u> of your lips?                                                     | 1                 | 2                     | 3                  | 4              |
| 9. How the outer corners of your lips look when your face is <u>relaxed</u> (still)? | 1                 | 2                     | 3                  | 4              |
| 10. How full your <u>upper lip</u> looks?                                            | 1                 | 2                     | 3                  | 4              |

© 2013 Memorial Sloan-Kettering Cancer Center. All rights reserved. This FACE-Q scale, nor any part thereof may be reproduced or utilized in any form, or by any means without prior consent by way of a License Agreement.

## Lines Overall

|  |            |          |            |           |
|-----------------------------------------------------------------------------------|------------|----------|------------|-----------|
|                                                                                   | Not at all | A little | Moderately | Extremely |
| 1. How <u>deep</u> the lines on your face are?                                    | 1          | 2        | 3          | 4         |
| 2. Lines you see in <u>photos</u> ?                                               | 1          | 2        | 3          | 4         |
| 3. Lines when your face is <u>relaxed</u> (still)?                                | 1          | 2        | 3          | 4         |
| 4. Lines when you <u>smile</u> ?                                                  | 1          | 2        | 3          | 4         |
| 5. The <u>number</u> of lines on your face?                                       | 1          | 2        | 3          | 4         |
| 6. How <u>noticeable</u> the lines on your face are?                              | 1          | 2        | 3          | 4         |
| 7. Lines when you <u>frown</u> ?                                                  | 1          | 2        | 3          | 4         |
| 8. How <u>old</u> the lines on your face make you look?                           | 1          | 2        | 3          | 4         |
| 9. Lines you see when you look in the <u>mirror</u> ?                             | 1          | 2        | 3          | 4         |
| 10. Lines you see under <u>bright lights</u> ?                                    | 1          | 2        | 3          | 4         |

© 2013 Memorial Sloan-Kettering Cancer Center. All rights reserved. This FACE-Q scale, nor any part thereof may be reproduced or utilized in any form, or by any means without prior consent by way of a License Agreement.

## Forehead Lines

|                                                                                   |            |          |            |           |
|-----------------------------------------------------------------------------------|------------|----------|------------|-----------|
|  |            |          |            |           |
|                                                                                   | Not at all | A little | Moderately | Extremely |
| 1. Lines on your forehead when you are <u>talking</u> ?                           | 1          | 2        | 3          | 4         |
| 2. Lines on your forehead when your face is <u>relaxed</u> (still)?               | 1          | 2        | 3          | 4         |
| 3. How <u>noticeable</u> the lines on your forehead are?                          | 1          | 2        | 3          | 4         |
| 4. How <u>tired</u> your forehead lines make you look?                            | 1          | 2        | 3          | 4         |
| 5. How <u>old</u> your forehead lines make you look?                              | 1          | 2        | 3          | 4         |
| 6. How <u>deep</u> the lines on your forehead are?                                | 1          | 2        | 3          | 4         |
| 7. The <u>number</u> of lines on your forehead?                                   | 1          | 2        | 3          | 4         |

© 2013 Memorial Sloan-Kettering Cancer Center. All rights reserved. This FACE-Q scale, nor any part thereof may be reproduced or utilized in any form, or by any means without prior consent by way of a License Agreement.

## Lines Between Eyebrows

|                                                                                   |            |          |            |           |
|-----------------------------------------------------------------------------------|------------|----------|------------|-----------|
|  |            |          |            |           |
|                                                                                   | Not at all | A little | Moderately | Extremely |
| 1. Lines between your eyebrows when your face is <u>relaxed</u> (still)?          | 1          | 2        | 3          | 4         |
| 2. How <u>old</u> the lines between your eyebrows make you look?                  | 1          | 2        | 3          | 4         |
| 3. Lines between your eyebrows making you look <u>angry</u> ?                     | 1          | 2        | 3          | 4         |
| 4. How <u>noticeable</u> the lines between your eyebrows are?                     | 1          | 2        | 3          | 4         |
| 5. How <u>deep</u> the lines between your eyebrows are?                           | 1          | 2        | 3          | 4         |
| 6. Lines between your eyebrows when you are <u>concentrating</u> ?                | 1          | 2        | 3          | 4         |
| 7. Lines between your eyebrows when you are <u>frowning</u> ?                     | 1          | 2        | 3          | 4         |

© 2013 Memorial Sloan-Kettering Cancer Center. All rights reserved. This FACE-Q scale, nor any part thereof may be reproduced or utilized in any form, or by any means without prior consent by way of a License Agreement.

## Crow's Feet

|  |            |          |            |           |
|-----------------------------------------------------------------------------------|------------|----------|------------|-----------|
|                                                                                   | Not at all | A little | Moderately | Extremely |
| 1. Crow's feet lines when your face is <u>relaxed</u> (still)?                    | 1          | 2        | 3          | 4         |
| 2. How <u>noticeable</u> your crow's feet lines are?                              | 1          | 2        | 3          | 4         |
| 3. How <u>tired</u> your crow's feet lines make you look?                         | 1          | 2        | 3          | 4         |
| 4. The <u>number</u> of crow's feet lines you have?                               | 1          | 2        | 3          | 4         |
| 5. How <u>old</u> your crow's feet lines make you look?                           | 1          | 2        | 3          | 4         |
| 6. Crow's feet lines when you <u>smile</u> ?                                      | 1          | 2        | 3          | 4         |
| 7. Crow's feet lines when you <u>squint</u> ?                                     | 1          | 2        | 3          | 4         |

© 2013 Memorial Sloan-Kettering Cancer Center. All rights reserved. This FACE-Q scale, nor any part thereof may be reproduced or utilized in any form, or by any means without prior consent by way of a License Agreement.

## Lip Lines

|                                                                                    |            |          |            |           |
|------------------------------------------------------------------------------------|------------|----------|------------|-----------|
|   |            |          |            |           |
|                                                                                    | Not at all | A little | Moderately | Extremely |
| 1. How the lines around your lips look compared with <u>other people</u> your age? | 1          | 2        | 3          | 4         |
| 2. How <u>old</u> the lines around your lips make you look?                        | 1          | 2        | 3          | 4         |
| 3. How <u>deep</u> the lines around your lips are?                                 | 1          | 2        | 3          | 4         |
| 4. The <u>number</u> of lines around your lips?                                    | 1          | 2        | 3          | 4         |
| 5. How <u>noticeable</u> the lines around your lips are?                           | 1          | 2        | 3          | 4         |
| 6. How the lines around your lips look when your lips are <u>puckered</u> ?        | 1          | 2        | 3          | 4         |

© 2013 Memorial Sloan-Kettering Cancer Center. All rights reserved. This FACE-Q scale, nor any part thereof may be reproduced or utilized in any form, or by any means without prior consent by way of a License Agreement.



## Marionette Lines

|                                                                                   |            |          |            |           |
|-----------------------------------------------------------------------------------|------------|----------|------------|-----------|
|  |            |          |            |           |
|                                                                                   | Not at all | A little | Moderately | Extremely |
| 1. How <u>angry</u> your marionette lines make you look?                          | 1          | 2        | 3          | 4         |
| 2. How <u>sad</u> your marionette lines make you look?                            | 1          | 2        | 3          | 4         |
| 3. How <u>tired</u> your marionette lines make you look?                          | 1          | 2        | 3          | 4         |
| 4. How your marionette lines look when your face is <u>relaxed</u> (still)?       | 1          | 2        | 3          | 4         |
| 5. How <u>deep</u> your marionette lines look?                                    | 1          | 2        | 3          | 4         |
| 6. How <u>old</u> your marionette lines make you look?                            | 1          | 2        | 3          | 4         |
| 7. How <u>noticeable</u> your marionette lines are?                               | 1          | 2        | 3          | 4         |

© 2013 Memorial Sloan-Kettering Cancer Center. All rights reserved. This FACE-Q scale, nor any part thereof may be reproduced or utilized in any form, or by any means without prior consent by way of a License Agreement.

## Skin Adverse Effects

|  |            |          |            |           |
|-----------------------------------------------------------------------------------|------------|----------|------------|-----------|
|                                                                                   | Not at all | A little | Moderately | Extremely |
| 1. Redness?                                                                       | 1          | 2        | 3          | 4         |
| 2. Uneven skin tone (darker and lighter areas)?                                   | 1          | 2        | 3          | 4         |
| 3. Skin sensitivity (e.g. to sunlight, skin products)?                            | 1          | 2        | 3          | 4         |
| 4. Parts of your face looking blotchy?                                            | 1          | 2        | 3          | 4         |
| 5. Parts of your face not <u>looking</u> smooth?                                  | 1          | 2        | 3          | 4         |
| 6. Parts of your face not <u>feeling</u> smooth to the touch?                     | 1          | 2        | 3          | 4         |
| 7. Tightness?                                                                     | 1          | 2        | 3          | 4         |
| 8. Itching?                                                                       | 1          | 2        | 3          | 4         |
| 9. Parts of your face looking scarred?                                            | 1          | 2        | 3          | 4         |
| 10. Burning?                                                                      | 1          | 2        | 3          | 4         |

© 2013 Memorial Sloan-Kettering Cancer Center. All rights reserved. This FACE-Q scale, nor any part thereof may be reproduced or utilized in any form, or by any means without prior consent by way of a License Agreement.

## Lips Adverse Effects

|  |            |          |            |           |
|-----------------------------------------------------------------------------------|------------|----------|------------|-----------|
|                                                                                   | Not at all | A little | Moderately | Extremely |
| 1. Your lips not <u>feeling</u> smooth (lumps, bumps)?                            | 1          | 2        | 3          | 4         |
| 2. Your lips looking asymmetric (uneven)?                                         | 1          | 2        | 3          | 4         |
| 3. Your lips not <u>looking</u> smooth (lumps, bumps)?                            | 1          | 2        | 3          | 4         |
| 4. Swelling?                                                                      | 1          | 2        | 3          | 4         |
| 5. Your lips feeling unnatural?                                                   | 1          | 2        | 3          | 4         |
| 6. Numbness?                                                                      | 1          | 2        | 3          | 4         |
| 7. Difficulty moving your lips (e.g. laughing, smiling)?                          | 1          | 2        | 3          | 4         |
| 8. Your lips feeling too big?                                                     | 1          | 2        | 3          | 4         |

© 2013 Memorial Sloan-Kettering Cancer Center. All rights reserved. This FACE-Q scale, nor any part thereof may be reproduced or utilized in any form, or by any means without prior consent by way of a License Agreement.

**eTable 2. RMT Statistical Indicators of Fit**

| Scale                      | Item           | Item location | SE    | Fit Residual | Chi-square | P-value |
|----------------------------|----------------|---------------|-------|--------------|------------|---------|
| Skin                       | End of day     | -0.63         | 0.18  | 0.49         | 0.49       | 0.79    |
|                            | Healthy        | -0.58         | 0.17  | -1.99        | 3.61       | 0.16    |
|                            | Attractive     | -0.33         | 0.16  | -0.56        | 1.25       | 0.54    |
|                            | Smooth         | -0.24         | 0.17  | 0.57         | 0.77       | 0.68    |
|                            | Clear          | -0.18         | 0.15  | -1.84        | 0.95       | 0.62    |
|                            | Refreshed      | -0.16         | 0.16  | -1.70        | 1.64       | 0.44    |
|                            | Hydrated       | 0.04          | 0.16  | -0.58        | 0.83       | 0.66    |
|                            | Wake up        | 0.05          | 0.16  | 0.67         | 0.79       | 0.67    |
|                            | Radiant        | 0.26          | 0.16  | -3.22        | 4.36       | 0.11    |
|                            | Tone           | 0.35          | 0.15  | -0.26        | 0.38       | 0.83    |
|                            | Pores          | 0.52          | 0.14  | 3.40         | 8.20       | 0.02    |
|                            | Even-colored   | 0.89          | 0.15  | 3.64         | 0.29       | 0.87    |
| Lips                       | Shape (bottom) | -0.88         | 0.08  | -2.00        | 16.09      | 0.07    |
|                            | Suit           | -0.67         | 0.08  | -3.15        | 8.08       | 0.53    |
|                            | Smile          | -0.32         | 0.08  | -1.33        | 9.03       | 0.44    |
|                            | Full (bottom)  | -0.18         | 0.08  | -1.67        | 7.37       | 0.60    |
|                            | Style          | -0.03         | 0.08  | -2.88        | 2.37       | 0.97    |
|                            | Shape (top)    | 0.05          | 0.08  | -3.58        | 7.29       | 0.61    |
|                            | Cupids Bow     | 0.16          | 0.08  | -1.86        | 4.95       | 0.83    |
|                            | Size           | 0.28          | 0.08  | -3.75        | 13.26      | 0.15    |
|                            | Corners        | 0.76          | 0.08  | 2.39         | 21.02      | 0.01    |
|                            | Full (top)     | 0.85          | 0.08  | -5.69        | 18.18      | 0.03    |
| Lines Overall              | Deep           | -0.60         | 0.15  | -0.88        | 3.71       | 0.16    |
|                            | Photos         | -0.42         | 0.14  | 1.34         | 0.11       | 0.95    |
|                            | Relaxed        | -0.34         | 0.15  | -1.14        | 1.10       | 0.58    |
|                            | Smile          | -0.05         | 0.15  | 2.37         | 1.38       | 0.50    |
|                            | Number         | -0.01         | 0.16  | -2.69        | 2.01       | 0.37    |
|                            | Noticeable     | 0.01          | 0.16  | -0.65        | 0.35       | 0.84    |
|                            | Frown          | 0.02          | 0.15  | 2.24         | 2.88       | 0.24    |
|                            | Old            | 0.25          | 0.14  | 0.82         | 2.71       | 0.26    |
|                            | Mirror         | 0.34          | 0.16  | -1.16        | 1.13       | 0.57    |
| Bright Lights              | 0.80           | 0.14          | -1.04 | 0.47         | 0.79       |         |
| Forehead Lines             | Talking        | -0.29         | 0.16  | 0.53         | 0.92       | 0.63    |
|                            | Relaxed        | -0.20         | 0.16  | 0.54         | 1.84       | 0.40    |
|                            | Noticeable     | -0.16         | 0.18  | -1.56        | 4.41       | 0.11    |
|                            | Tired          | 0.00          | 0.16  | -0.24        | 0.05       | 0.98    |
|                            | Old            | 0.00          | 0.15  | -1.45        | 0.91       | 0.64    |
|                            | Deep           | 0.03          | 0.17  | -1.64        | 2.83       | 0.24    |
|                            | Number         | 0.62          | 0.16  | 0.58         | 0.42       | 0.81    |
| Lines Between the Eyebrows | Relaxed        | -2.07         | 0.18  | -0.05        | 5.26       | 0.07    |
|                            | Old            | -0.21         | 0.16  | 0.00         | 2.49       | 0.29    |
|                            | Angry          | 0.07          | 0.15  | 0.86         | 4.47       | 0.11    |
|                            | Noticeable     | 0.17          | 0.17  | -1.89        | 1.07       | 0.59    |

© 2016 American Medical Association. All rights reserved.

|                   |                |              |             |             |             |             |
|-------------------|----------------|--------------|-------------|-------------|-------------|-------------|
|                   | Deep           | 0.21         | 0.17        | -0.13       | 0.23        | 0.89        |
|                   | Concentrate    | 0.75         | 0.17        | -0.53       | 2.02        | 0.36        |
|                   | Frown          | 1.08         | 0.17        | 0.24        | 1.54        | 0.46        |
| Crow's Feet Lines | <b>Relaxed</b> | <b>-1.34</b> | <b>0.16</b> | <b>1.03</b> | <b>8.44</b> | <b>0.02</b> |
|                   | Noticeable     | -0.11        | 0.17        | -3.18       | 8.03        | 0.02        |
|                   | Tired          | -0.10        | 0.15        | -2.55       | 0.51        | 0.77        |
|                   | Number         | 0.00         | 0.16        | 0.61        | 4.67        | 0.10        |
|                   | Old            | 0.02         | 0.15        | -0.71       | 1.15        | 0.56        |
|                   | Smile          | 0.76         | 0.16        | -0.98       | 0.15        | 0.93        |
|                   | Squint         | 0.76         | 0.16        | -0.86       | 0.19        | 0.91        |
| Lip Lines         | Compared       | -1.41        | 0.11        | 1.94        | 18.29       | 0.01        |
|                   | Old            | -0.18        | 0.11        | -0.40       | 2.89        | 0.82        |
|                   | Deep           | 0.02         | 0.11        | -3.95       | 8.81        | 0.18        |
|                   | Number         | 0.23         | 0.11        | -2.26       | 3.57        | 0.74        |
|                   | Noticeable     | 0.42         | 0.11        | -4.15       | 11.91       | 0.06        |
|                   | Puckered       | 0.92         | 0.11        | 1.91        | 10.94       | 0.09        |
| Marionette Lines  | Angry          | -1.18        | 0.17        | 0.49        | 5.30        | 0.07        |
|                   | Sad            | -0.59        | 0.17        | 0.56        | 0.21        | 0.90        |
|                   | Tired          | 0.22         | 0.16        | -2.75       | 1.39        | 0.50        |
|                   | Relaxed        | 0.26         | 0.17        | -2.80       | 1.22        | 0.54        |
|                   | Deep           | 0.27         | 0.17        | -2.45       | 2.17        | 0.34        |
|                   | Old            | 0.44         | 0.16        | -2.99       | 0.54        | 0.77        |
|                   | Noticeable     | 0.58         | 0.18        | -2.33       | 2.49        | 0.29        |

Note: Items are in serial order for each scale; SE, Standard Error; ChiSq Chi-Square Value. The first 2 scales (Skin, Lips) measure satisfaction with aspects of their appearance. The lines scales measure how bothered someone is with aspects of their appearance.
